# Supplementary material for: GDF-15 in tumor-derived exosomes promotes muscle atrophy via Bcl-2/caspase-3 pathway
Source: PubMed Central journal article supplement (PMC8980041; doi:10.1038/s41420-022-00972-z), 2022-04-04

# Original Western Blots

**Figure 1C**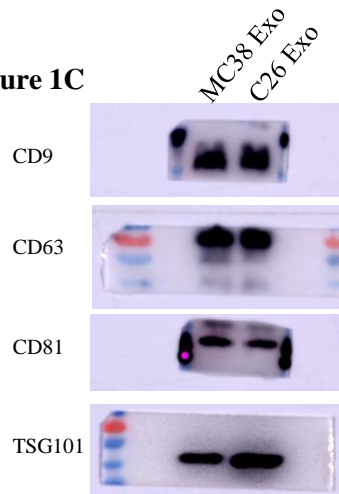**Figure 2A**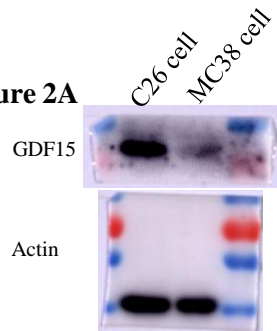**Figure 2B**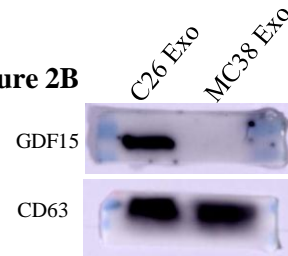**Figure 2C**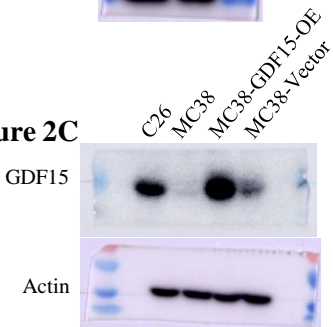**Figure 2D**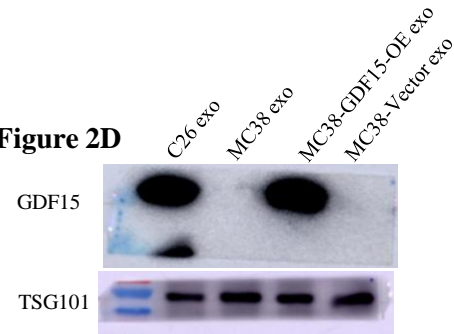**Figure 1F**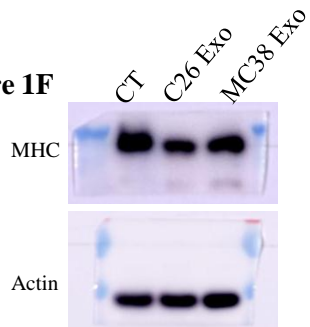**Figure 2E**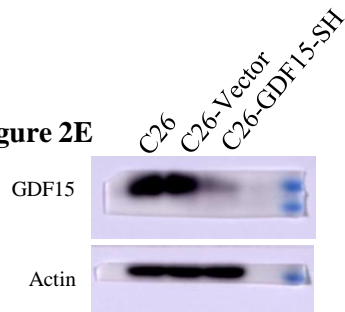**Figure 2F**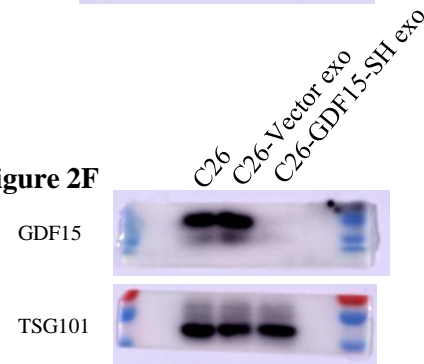

**Figure 2G**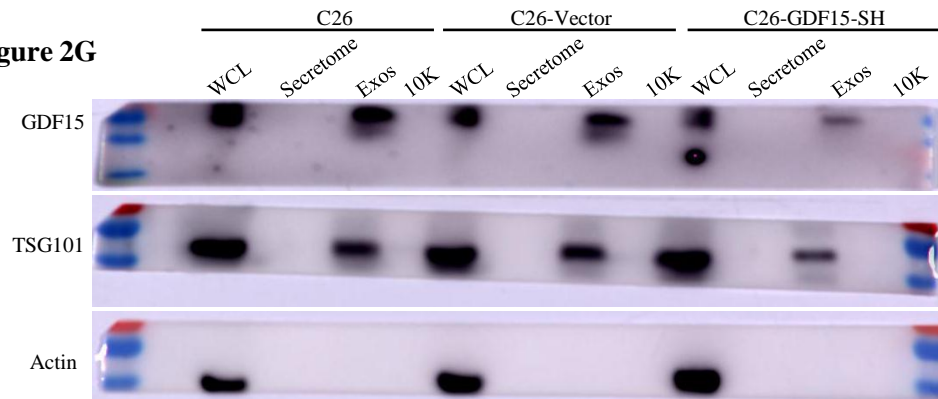**Figure 2I**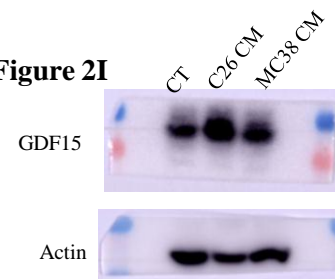**Figure 2H**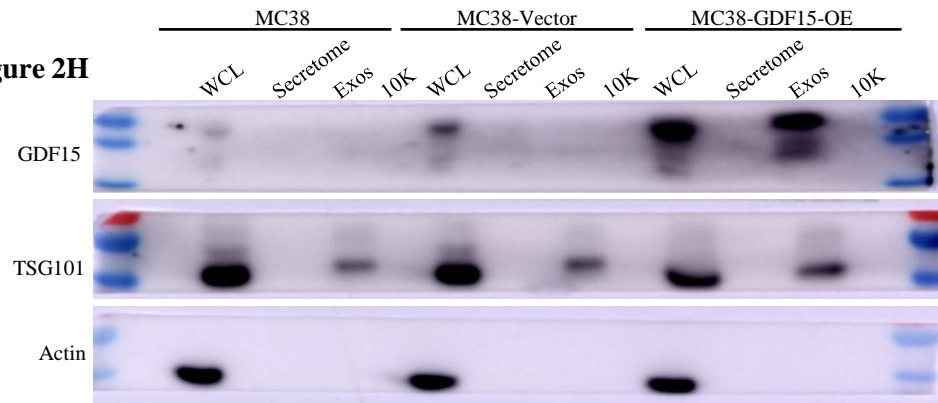**Figure 2J**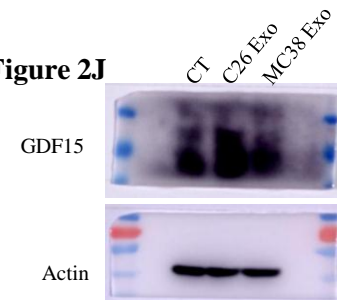

**Figure 3C**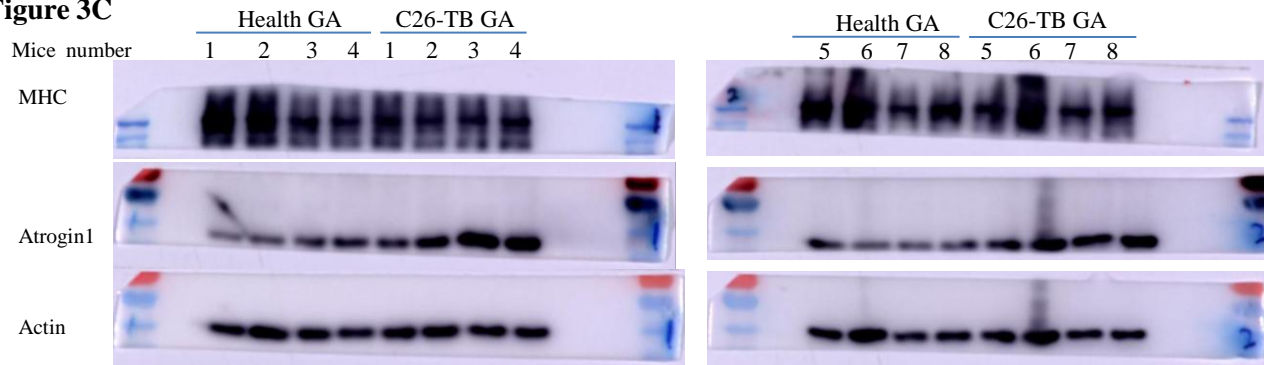**Figure 3E**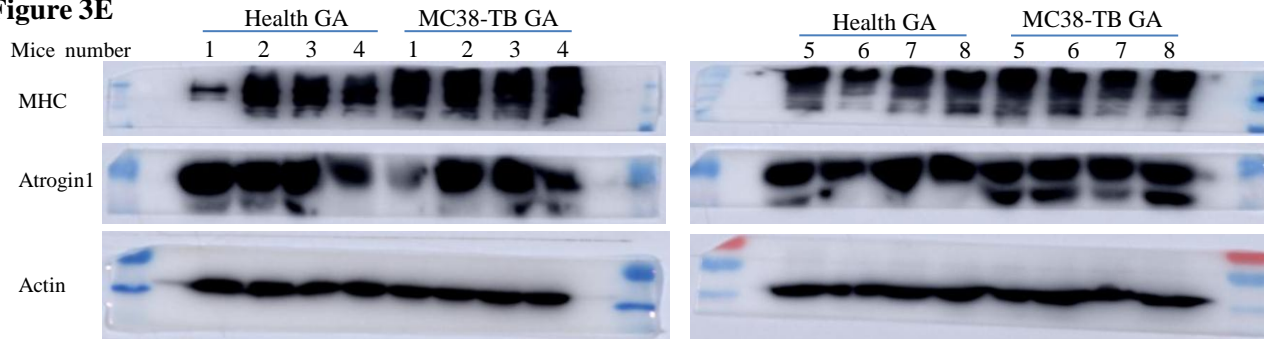

**Figure 3G**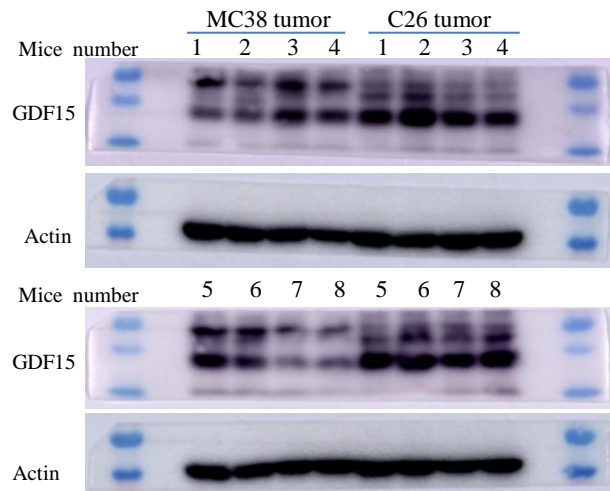**Figure 3I**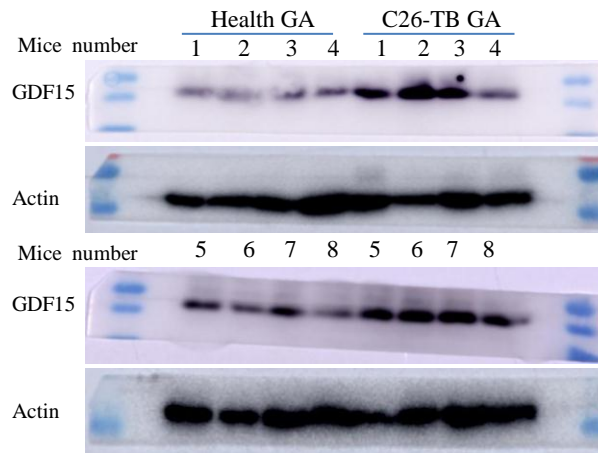**Figure 3H**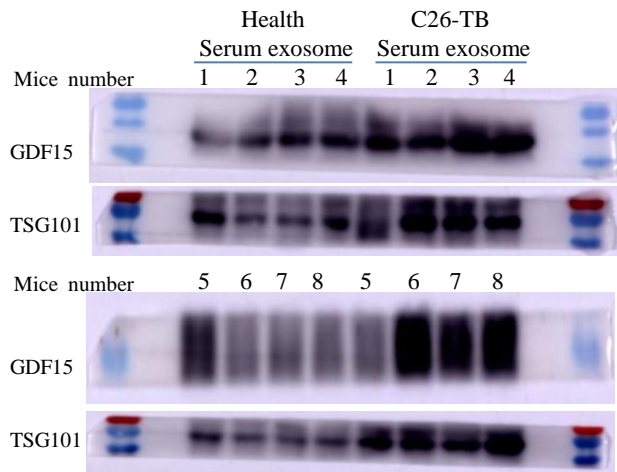**Figure 3J**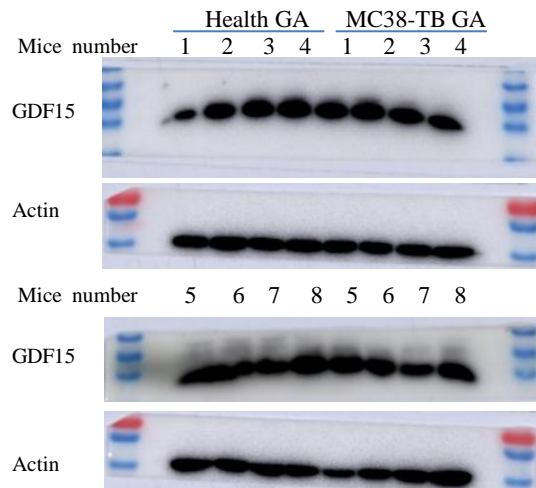

**Figure 4C**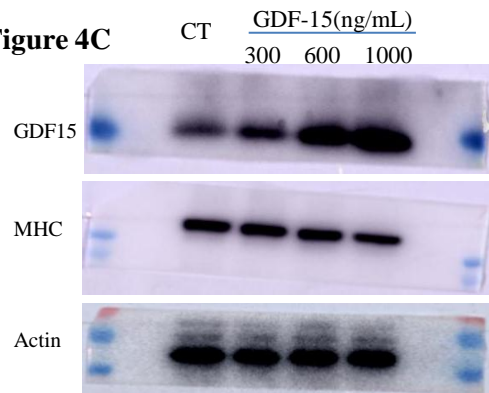**Figure 4F**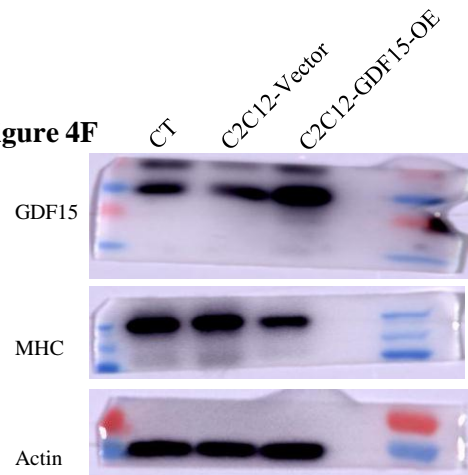**Figure 5A**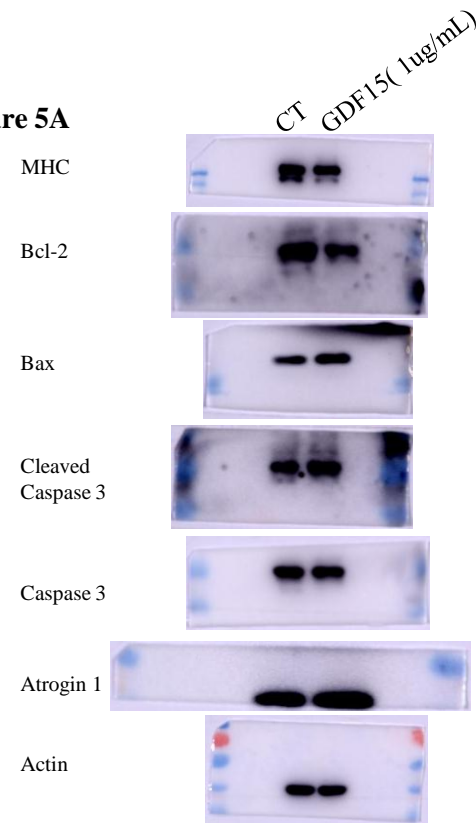

**Figure 5B**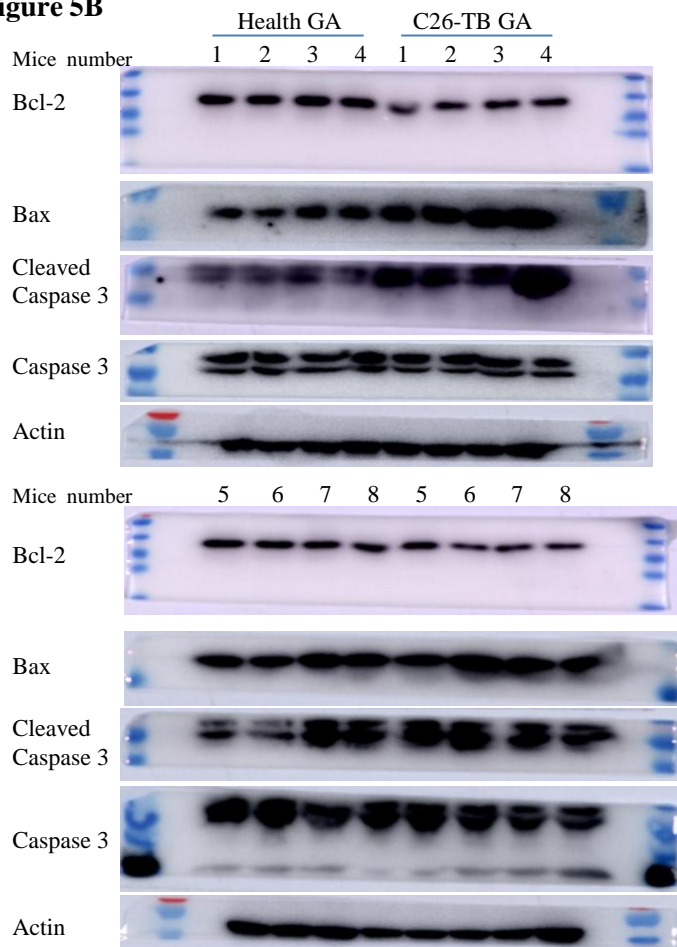**Figure 5C**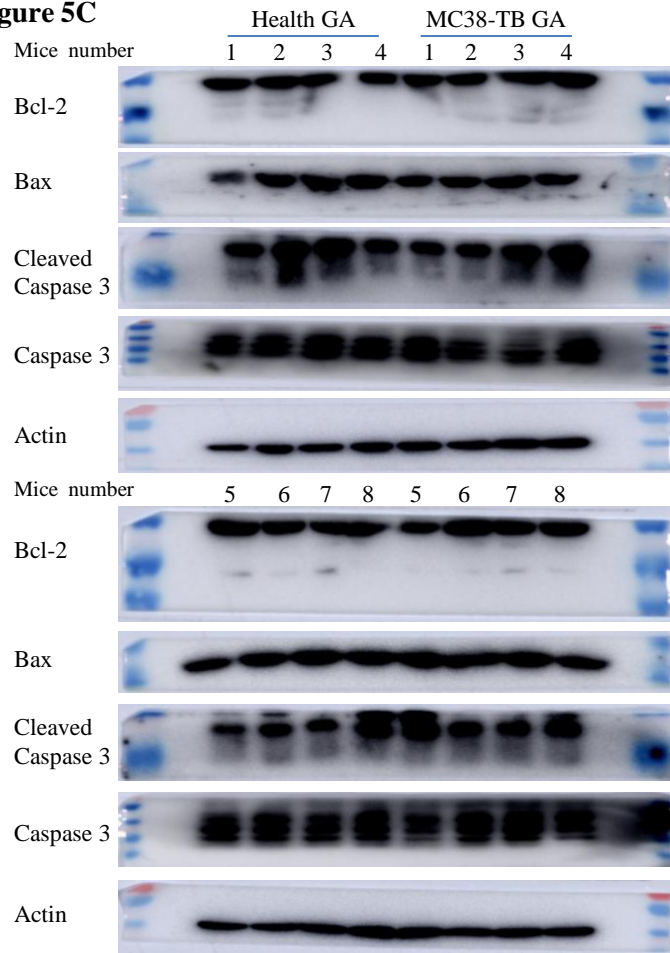

**Figure 6C**

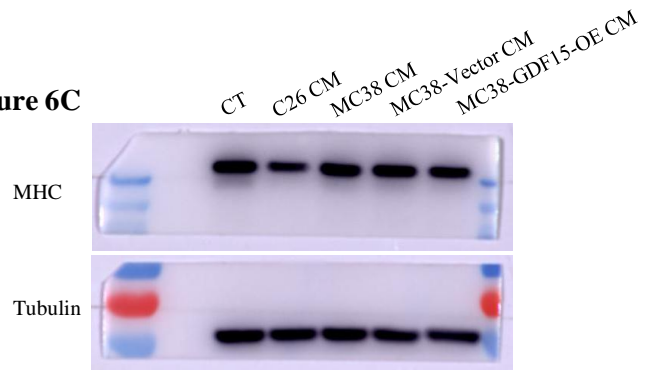

**Figure 6I**

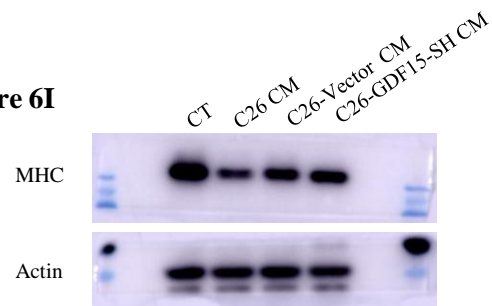

**Figure 6F**

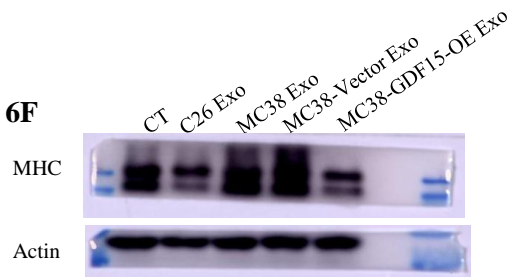

**Figure 6L**

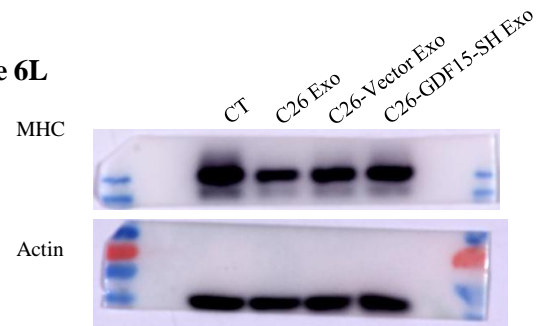



**Figure 7A**

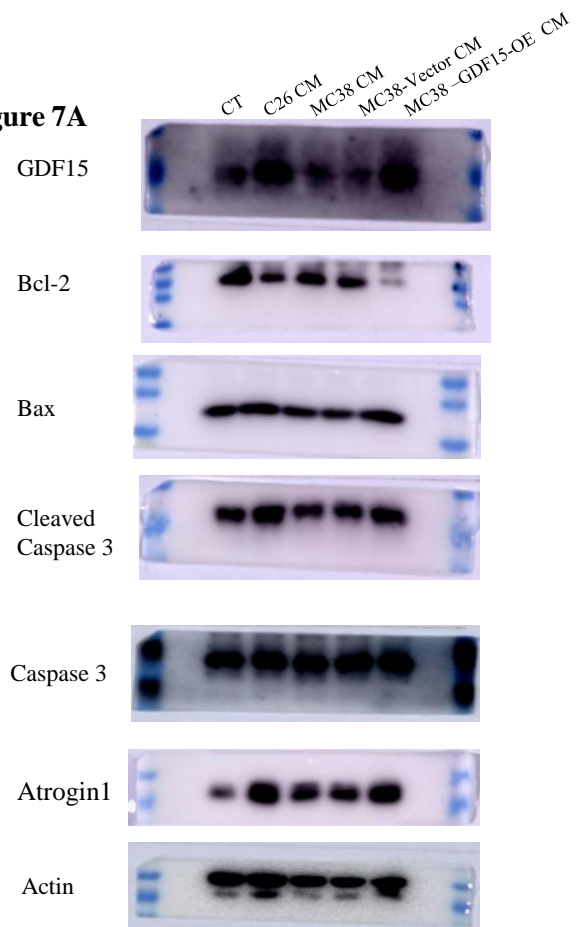

**Figure 7B**

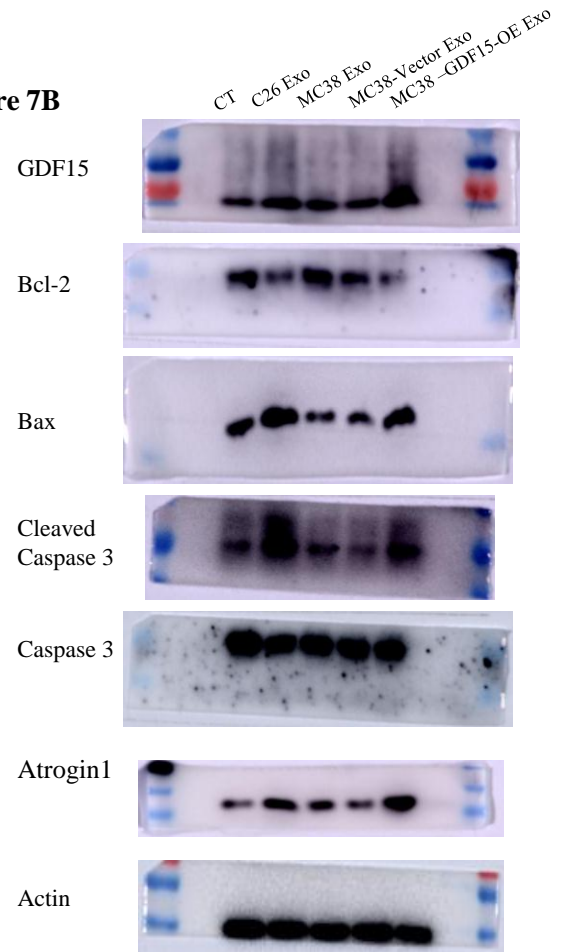

**Figure 7C**

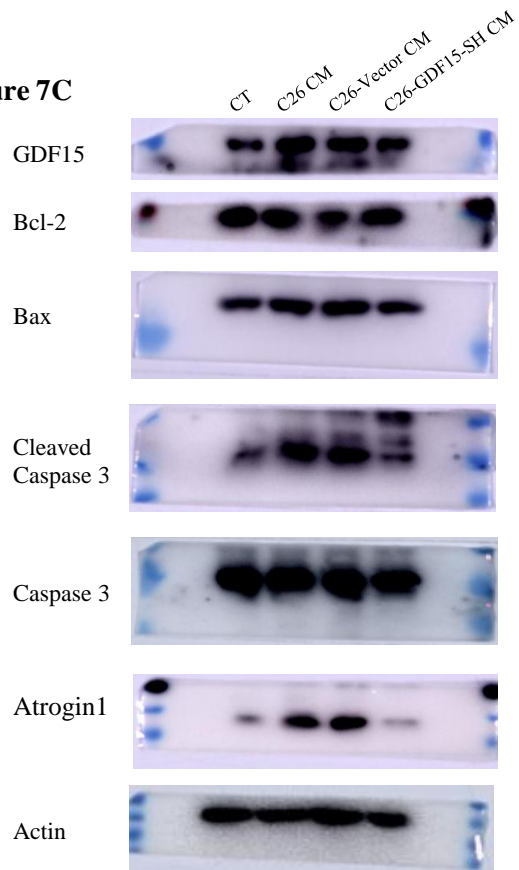

**Figure 7D**

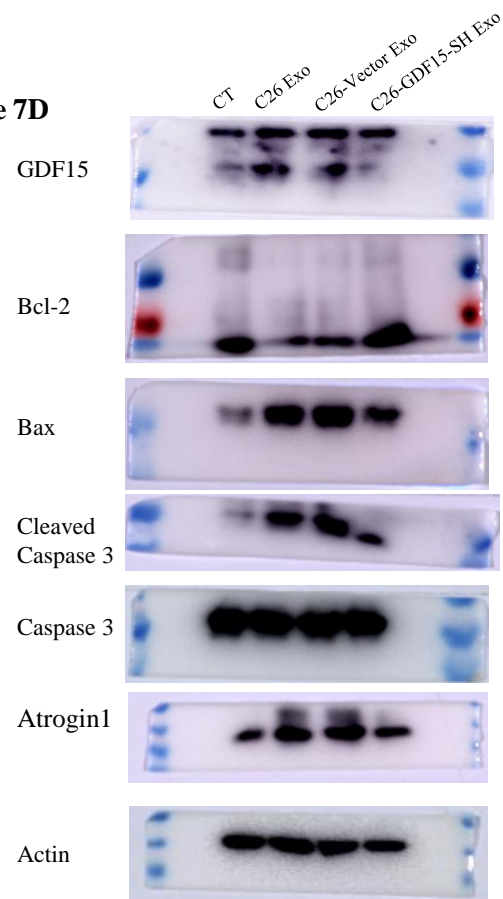

Supplement: 41420_2022_972_MOESM1_ESM.pdf [file 41420_2022_972_MOESM1_ESM.pdf]
